RESEARCH ARTICLE

# Bacterial Etiology and Risk Factors Associated with Cellulitis and Purulent Skin Abscesses in Military Trainees

Ryan C. Johnson<sup>1</sup>, Michael W. Ellis<sup>2</sup>, Carey D. Schlett<sup>3</sup>, Eugene V. Millar<sup>3</sup>, Patrick T. LaBreck<sup>1</sup>, Deepika Mor<sup>3</sup>, Emad M. Elassal<sup>3</sup>, Jeffrey B. Lanier<sup>4</sup>, Cassie L. Redden<sup>5,6</sup>, Tianyuan Cui<sup>3</sup>, Nimfa Teneza-Mora<sup>3</sup>, Danett K. Bishop<sup>7</sup>, Eric R. Hall<sup>7</sup>, Kimberly A. Bishop-Lilly<sup>5,6</sup>, D. Scott Merrell<sup>1,8\*</sup>

**1** Department of Microbiology and Immunology, Uniformed Services University of the Health Sciences, Bethesda, Maryland, United States of America, **2** The University of Toledo Medical Center, Toledo, Ohio, United States of America, **3** Infectious Disease Clinical Research Program, Department of Preventive Medicine and Biometrics, Uniformed Services University of the Health Sciences, Bethesda, Maryland, United States of America, **4** Martin Army Community Hospital, Fort Benning, Georgia, United States of America, **5** The Henry M. Jackson Foundation for the Advancement of Military Medicine, Inc, Bethesda, Maryland, United States of America, **6** Biological Defense Research Directorate, Naval Medical Research Center, Frederick, Fort Detrick, Maryland, United States of America, **7** Infectious Diseases Directorate, Wound Infections Department, Naval Medical Research Center, Silver Spring, Maryland, United States of America, **8** Department of Medicine, Uniformed Services University of the Health Sciences, Bethesda, Maryland, United States of America

\* [douglas.merrell@usuhs.edu](mailto:douglas.merrell@usuhs.edu)

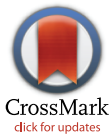

**OPEN ACCESS**

**Citation:** Johnson RC, Ellis MW, Schlett CD, Millar EV, LaBreck PT, Mor D, et al. (2016) Bacterial Etiology and Risk Factors Associated with Cellulitis and Purulent Skin Abscesses in Military Trainees. PLoS ONE 11(10): e0165491. doi:10.1371/journal.pone.0165491

**Editor:** Mohamed N. Seleem, Purdue University, UNITED STATES

**Received:** July 31, 2016

**Accepted:** October 12, 2016

**Published:** October 25, 2016

**Copyright:** This is an open access article, free of all copyright, and may be freely reproduced, distributed, transmitted, modified, built upon, or otherwise used by anyone for any lawful purpose. The work is made available under the [Creative Commons CC0](https://creativecommons.org/licenses/by/4.0/) public domain dedication.

**Data Availability Statement:** All relevant data are within the paper and its Supporting Information files.

**Funding:** Primary support for this work was provided by a US Department of Defense Program Project Grant (HT9404-12-1-0019 to DSM, MWE, and ERH). Additional support for this work was provided by the Department of Defense Global Emerging Infections Surveillance and Response System (GEIS;HU0001-10-1-0018 to MWE) and the Military Infectious Diseases Research Program (MIDRP; HT9404-12-1-0012 to M.W.E). The

## Abstract

Military trainees are at high risk for skin and soft-tissue infections (SSTIs). Although *Staphylococcus aureus* is associated with purulent SSTI, it is unclear to what degree this pathogen causes nonpurulent cellulitis. To inform effective prevention strategies and to provide novel insights into SSTI pathogenesis, we aimed to determine the etiology of SSTI in this population. We conducted a prospective observational study in US Army Infantry trainees with SSTI (cutaneous abscesses and cellulitis) from July 2012 through December 2014. We used standard microbiology, serology, and high-throughput sequencing to determine the etiology of SSTI. Furthermore, we compared purported risk factors as well as anatomic site colonization for *S. aureus*. Among 201 SSTI cases evaluated for SSTI risk factors, cellulitis was associated with lower extremity blisters ( $P = 0.01$ ) and abscess was associated with methicillin-resistant *S. aureus* (MRSA) colonization ( $P < 0.001$ ). Among the 22 tested cellulitis cases that were part of the microbiome analysis, only 1 leading edge aspirate was culturable (Coagulase-negative *Staphylococcus*). Microbiome evaluation of aspirate specimens demonstrated that *Rhodanobacter terrae* was the most abundant species (66.8% average abundance), while abscesses were dominated by *S. aureus* (92.9% average abundance). Although abscesses and cellulitis share the spectrum of clinical SSTI, the bacterial etiologies as determined by current technology appear distinct. Furthermore, the presence of atypical bacteria within cellulitis aspirates may indicate novel mechanisms of cellulitis pathogenesis.

Clinical Trials Registration: [NCT01105767](https://clinicaltrials.gov/ct2/show/study/NCT01105767).

protocol was executed by the Infectious Disease Clinical Research Program (IDCRP), a Department of Defense (DoD) program executed through the Uniformed Services University of the Health Sciences, and funded in part by the National Institute of Allergy and Infectious Diseases, National Institutes of Health (NIH), under Inter-Agency Agreement [Y1-AI-5072]. The funders had no role in study design, data collection and analysis, decision to publish, or preparation of the manuscript.

**Competing Interests:** The authors have declared that no competing interests exist.

## Introduction

Skin and soft-tissue infections (SSTIs) are among the most frequently observed infections in the ambulatory and hospital settings [1–3]. In 2005 alone, approximately 14.2 million SSTI cases were reported in the United States; a 65% increase from 1997 [2]. Although severe SSTIs such as necrotizing fasciitis are encountered, the bulk of disease manifests as abscesses and cellulitis [2]. Despite numerous established SSTI risk factors, whether certain risk factors are specifically associated with either cutaneous abscess or cellulitis formation have yet to be determined [4].

Although SSTIs afflict millions of individuals world-wide, certain congregate populations, such as military service members, are at increased risk [5, 6]. While *Staphylococcus aureus*, and in particular community-associated methicillin-resistant *Staphylococcus aureus* (CA-MRSA) has been identified as the leading cause of most purulent SSTIs [7, 8], to what extent this pathogen causes nonpurulent cellulitis remains unknown.

Without a site to culture, bacterial etiology for nonpurulent cellulitis has been historically unsuccessful. Dogma suggests that cellulitis is caused by both *S. aureus* and beta-hemolytic streptococci (BHS); however, the actual degree each pathogen contributes is unclear [9–11]. Additionally, despite diverse sample collection methods (punch biopsy, needle aspirate and blood sample), a pathogen is isolated less than 30% of the time [12–17]. The changing epidemiology of SSTI and uncertainty of microbial etiology of nonpurulent cellulitis have exposed important clinical knowledge gaps.

Herein we report our findings from a prospective observational study aimed at discerning SSTI-specific risk factors as well as detailed characterization of the microbiology of both purulent and nonpurulent SSTI using a high-throughput sequencing strategy in addition to standard microbiology and serology. Results suggest that atypical bacteria may play an important role in nonpurulent cellulitis pathogenesis.

## Materials and Methods

### Study design

This was a prospective observational study using clinical data, anatomic site colonization information, acute and convalescent serum specimens, risk factor questionnaires, and leading edge aspirate or abscess specimens to determine the etiology of cutaneous abscesses and nonpurulent cellulitis and to determine risk factors associated with each SSTI manifestation. The study population consisted of US Army soldiers undergoing 14-week Infantry training at Fort Benning, Georgia. This all male population was ethnically diverse, in good general health, and between the ages of 17 and 42 years. As defined in DoD Directive (DoDD) 3216.02 “For purposes of legal capacity to participate in DoD-conducted or -supported research involving human subjects, all active duty Service members and all Reserve Component members in a Federal duty status are considered for purposes of this Instruction to be adults.” Thus, any individuals that were 17 years of age were consented as adults. The Uniformed Services University Infectious Diseases Institutional Review Board approved the investigation and written consent procedure (IDCRP-074). All participants provided written consent to participate in the study.

### Eligibility, Enrollment, and Data Collection

We identified potential participants and enrolled them prospectively. Eligible participants consisted of Infantry trainees seeking medical care at the Troop Medical Clinic (TMC) for SSTI from July 2012 to December 2014. All eligible trainees were approached and consented to allow investigators to: 1) obtain pertinent SSTI-related information from the electronic medical

record, and 2) to obtain pertinent specimens from the clinical microbiological lab. At enrollment, all consenting participants underwent anatomic site (anterior nares, oropharynx, inguinal, and perirectal) screening for *S. aureus* (BD BBL CultureSwabs® (BD Diagnostic, Sparks, MD)) and completed a questionnaire to assess prior exposure to SSTI risk factors [18].

We defined cellulitis as an acute infection characterized by diffuse inflammation of skin and associated skin structures with at least two of the following signs or symptoms on the affected area: erythema, edema or induration, warmth, tenderness to palpation or pain. We defined abscess as an acute skin and skin structure infection characterized by a collection of pus within the dermis or deeper that was accompanied by erythema, edema, and/or induration, and tenderness. We defined nonpurulent cellulitis as cellulitis with no purulent drainage or exudate and no associated abscess. For inclusion as a nonpurulent cellulitis participant, the minimum affected area of erythema, edema, and/or induration was 36 cm<sup>2</sup>. Participants were consented and enrolled independent of abscess/cellulitis body location except as indicated below. All obtained cellulitis aspirates were included in subsequent microbiome analyses and comparable numbers of abscess samples were randomly selected for inclusion.

Exclusion criteria included prior antibiotic administration within two weeks before initial presentation, infection on the face or associated with a surgical site, animal or human bite wound, evidence of suspected bacteremia/sepsis/deep soft tissue infection, or any underlying condition such as neutropenia, vascular insufficiency, or diabetes.

## Study procedures

For participants with abscesses, the infection site was cleaned with 4% chlorhexidine and isopropyl alcohol prior to incision. Two swabs (BD BBL CultureSwabs® (BD Diagnostic, Sparks, MD)) were then obtained from within the abscess cavity: one was sent for microbiological culture, and the other was immediately placed at -80 C until used for microbiome analysis. For participants with nonpurulent cellulitis, the leading edge aspirate was performed in sterile fashion in the following manner. After the leading edge of maximum inflammation was identified, the area was first anesthetized using occlusive dressing and topical lidocaine-prilocaine (Emla™ cream), then cleaned with 4% chlorhexidine solution and isopropyl alcohol wipe. A 22-gauge needle attached to a 10 ml sterile syringe loaded with 1.5 ml sterile nonbacteriostatic saline was introduced into the subcutaneous tissue, and the solution was slowly injected forming a wheal, then immediately aspirated. One half of the recovered volume (approximately 0.5 ml) was immediately frozen at -80 C and sent for microbiome analysis. The remaining volume (approximately 0.5 mL) was immediately inoculated into 10 ml of fastidious broth (Remel, Lenexa, KS) and processed for bacterial culture. Post aspiration, the participant underwent phlebotomy to obtain serum samples for immunological surveillance (acute samples) and was monitored for 21–28 days at which time a second phlebotomy was performed (convalescent samples). Follow-up assessments were done at post-procedure days 2–3 and 21–28 for all participants to monitor SSTI resolution.

Anatomical site colonization samples were cultured in 6.5% NaCl enriched broth as previously described [19]. Leading edge aspirate specimens were incubated at 35°C in CO<sub>2</sub>. Specimens were assessed daily for visible turbidity; and when present, were subcultured onto TSA 5% Sheep blood, MacConkey, chocolate, and anaerobic plates using standard lab techniques. After five days of incubation, blind subculture was performed in the same manner. Abscess cultures were conducted according to standard procedures at the Martin Army Community Hospital microbiology laboratory [20]. *S. aureus* isolates were typed using pulsed-field gel electrophoresis (PFGE) and resistance/virulence determinants were assessed using PCR as previously described [21].

## Serological analysis

Acute and convalescent blood samples were allowed to clot for a minimum of 30 minutes and serum was isolated by centrifugation at 2500 rpm for 15 minutes. Anti-streptococcal DNase B, and Streptolysin O (ASO) antibody titer determinations were performed at the reference laboratory QuestDiagnostics (Chantilly, VA).

## DNA extraction, amplification, sequencing, and statistical analysis

For abscess swabs, bacterial genomic DNA extraction and PCR amplification was performed in an identical fashion as previously described [18]. For the cellulitis aspirates, 0.5 mls of the recovered nonbacteriostatic saline was mixed with an equal volume of lysis solution (GenElute bacterial genomic DNA kit (Sigma-Aldrich)) containing lysozyme (45 mg/ml), mutanolysin (125 U/ml), and lysostaphin (0.16 mg/ml) and allowed to incubate for 30 min at 37°C. Proteinase K (0.95 mg/ml) and lysis solution C (1 ml) were subsequently added to the sample and incubated for 10 minutes at 55°C. The remaining column purification steps were performed to the manufacturer's specifications. Amplification of the V1-V3 region of the 16S rRNA gene from the purulent abscess and cellulitis specimens was performed as previously described [18]. All samples were multiplexed and sequenced in a single 454 pyrosequencing run using the Roche GS FLX Titanium 454 sequencer at the Naval Medical Research Center in Fredrick, Maryland. Raw DNA sequences were quality processed and assigned taxonomy information using Mothur (v.1.34.4) as previously described [18]. Subsampling was not performed for our data set given that no diversity comparisons were utilized. To control for possible reagent contaminants, we also prepared 0.5 mls of sterile nonbacteriostatic saline (the same as used for aspirate collection) for 16S amplification and sequencing using the same reagents and 454 sequencer as described above. The nonbacteriostatic saline sample was sequenced in a separate pyrosequencing reaction in combination with an ongoing fecal microbiome study in our laboratory and yielded 3 usable reads; all of which were assigned to the alphaproteobacteria class (S1 File).

For full-length 16S rRNA gene sequencing, total genomic DNA from four randomly chosen cellulitis samples were subjected to PCR amplification of the 16S rRNA gene using the 8F and 1492R primers [22]. The PCRs were performed in 50 µl reactions containing nuclease-free water, 125 U Fidelity Taq DNA polymerase (Affymetrix), and 0.6 µM of the forward and reverse primers. PCR mixtures were incubated at 95°C for 90 seconds, 34 cycles of 95°C for 30 seconds, 50°C for 30 seconds and 68°C for 2 minutes followed by a final extension of 68°C for 5 minutes. Five technical replicates of each PCR reaction were combined and purified using the QIAquick PCR Purification Kit (Qiagen). The purified PCR products were then ligated into the pGEM-T easy vector (Promega) and transformed into *E. coli* TOP10 cells. Transformants were selected on LB agar supplemented with Ampicillin (Amp) (100 µg/ml), X-gal (40 µg/ml) and IPTG (1 µM). At least 10 white colonies per transformation were selected and grown overnight in LB-Amp broth with shaking at 200 rpm. Plasmids were isolated using the QIAprep Spin Miniprep Kit (Qiagen).

Seven sequencing reactions were performed for each plasmid sample to ensure complete coverage of both strands of the 16S rRNA gene. The insert within the pGEM-T easy vector was sequenced using the following primers: T7, SP6, 8F, 1492R, 515F, 806R, and 919F (Promega) [22, 23]. Sequencing was performed as previously described [24]. DNA chromatograms were visualized using Chromas Lite (Technelysium). Full-length 16S sequences were manually assembled and taxonomy information was assigned after alignment to the RDP database [25].

## Statistical analyses

For the risk factor assessment analysis, p-values for the “median age, years (range)” and “median (range) no. of weeks in training at enrollment” were calculated with the Wilcoxon rank-sum test. For all other comparisons, the chi square test was used to generate p-values. When variable counts were less than 5, the Fisher’s exact p-value was used.

## Results

### Participant characteristics

We enrolled a total of 241 trainees (121 abscess and 120 cellulitis). Of these, 40 (18 abscess and 22 cellulitis) were part of the microbiome portion of the study and 201 were utilized for SSTI risk factor assessment. Demographic and questionnaire data for the 201 SSTI risk factor assessment participants (103 abscess, 98 cellulitis) are shown in [Table 1](#). Characteristics of the microbiome participants are outlined in [Table 2](#) and [Table 3](#).

### Clinical characteristics and risk factor assessment

For the risk factor assessment participants, most abscesses were caused by *S. aureus* (70.9%), 44.7% and 26.2% of which were MRSA and MSSA, respectively. PFT USA300 was the predominant *S. aureus* type (81.5%). Other observed pulsed-field types included USA400 (3.1%), and USA800 (1.5%). Infection site data for the 201 SSTI risk factor participants demonstrated anatomic differences between SSTI entities: cellulitis was more commonly observed on the lower extremities than abscesses ( $P < 0.001$ ) ([Table 1](#)).

Nasal *S. aureus* colonization was common and similar between both groups (52.4% and 51%). Additionally, colonization at any anatomic site was remarkably high – present in 91.3% of abscess participants and 86.7% of nonpurulent cellulitis participants. Interestingly, 62.8% of abscess patients were colonized with MRSA compared with 27.1% of cellulitis participants ( $P < 0.001$ ). With regard to potentially modifiable risk factors, cellulitis was associated with lower extremity blisters ( $P = 0.01$ ).

### Culture analysis for microbiome participants

Culture data was available for 9 of the microbiome participants with cutaneous abscess. Of these 9, 5 were positive for MRSA (55.6%), 1 for MSSA (11.1%), and 3 grew non-*S. aureus* bacteria (33.3%) ([Table 2](#)). Unlike the cutaneous abscesses, only one of the 22 cellulitis aspirates analyzed (4.5%) grew bacteria (CNS) ([Table 3](#)). Body site culture analysis for all 40 microbiome participants revealed that *S. aureus* (MRSA and MSSA) was routinely found throughout the body (abscess group consented body sites: nose-52.9%, oropharynx-37.5%, perianal-33.3%, inguinal-20%) (cellulitis group consented body sites: nose-71.4%, oropharynx-42.9%, perianal-53.3%, inguinal-47.4%) ([Tables 2 and 3](#)). While MSSA and CNS were frequently isolated from all body sites, MRSA was only detected 6 times total: twice in the nose, once in the oropharynx, twice in the perianal region, and once at the inguinal body site. Of note, one cellulitis patient (ID# 2758) had MRSA cultured from all 4 body sites tested.

### ASO and anti-DNase B titer analysis

Despite the fact that they are not typically able to be cultured, *S. aureus* or streptococci are often assumed to be the cause of cellulitis. Therefore, we also assessed ASO and anti-DNase B titers in the cellulitis patients. At initial presentation, 7 of the 21 examined cellulitis patients (33.3%) had elevated ASO titers ([Table 3](#)). Of those 7 patients, 5 maintained elevated ASO titers up to 21–28 days post SSTI diagnosis. Only one participant who presented with normal

Table 1. Abscess and cellulitis risk factor assessment.

|                                                                | SSTI Cases (n = 201)                |                                       | P-Value <sup>b</sup> |
|----------------------------------------------------------------|-------------------------------------|---------------------------------------|----------------------|
|                                                                | Abscess Only <sup>a</sup> (n = 103) | Cellulitis Only <sup>a</sup> (n = 98) |                      |
| <b>Median Age, years (Range)</b>                               | 19 (18–21)                          | 20 (18–22)                            | 0.06                 |
| <b>Race/Ethnicity<sup>c</sup></b>                              |                                     |                                       | <b>0.04</b>          |
| White, Non-Hispanic                                            | 65 (63.1%)                          | 78 (79.6%)                            |                      |
| Hispanic                                                       | 23 (22.3%)                          | 13 (13.3%)                            |                      |
| Black, Non-Hispanic                                            | 11 (10.7%)                          | 3 (3.1%)                              |                      |
| Others, Non-Hispanic                                           | 3 (2.9%)                            | 4 (4.1%)                              |                      |
| <b>Site of Infection<sup>d</sup></b>                           |                                     |                                       |                      |
| Lower extremity                                                | 49 (47.6%)                          | 75 (76.5%)                            | <b>&lt;0.001</b>     |
| Upper extremity                                                | 41 (39.8%)                          | 24 (24.5%)                            | <b>0.02</b>          |
| Head                                                           | 5 (4.9%)                            | 0 (0%)                                | <b>0.03</b>          |
| Thorax                                                         | 11 (10.7%)                          | 0 (0%)                                | <b>&lt;0.001</b>     |
| Groin/Inguinal/Perineal                                        | 1 (1%)                              | 0 (0%)                                | 1                    |
| <b>Median (Range) No. of weeks in training at enrollment</b>   | 5 (3–8)                             | 4 (2–7)                               | 0.24                 |
| <b>Season of Enrollment</b>                                    |                                     |                                       |                      |
| Spring                                                         | 21 (20.4%)                          | 22 (22.4%)                            | 0.58                 |
| Summer                                                         | 49 (47.6%)                          | 39 (39.8%)                            |                      |
| Fall                                                           | 22 (21.4%)                          | 21 (21.4%)                            |                      |
| Winter                                                         | 11 (10.7%)                          | 16 (16.3%)                            |                      |
| <b>Nasal Colonization with <i>S. aureus</i></b>                | 54 (52.4%)                          | 50 (51%)                              | 0.84                 |
| <b>Nasal Colonization with MRSA</b>                            | 24 (44.4%)                          | 7 (14%)                               | <b>&lt;0.001</b>     |
| <b>Any Site Colonization with <i>S. aureus</i><sup>e</sup></b> | 94 (91.3%)                          | 85 (86.7%)                            | 0.3                  |
| <b>Any Site Colonization with MRSA<sup>e</sup></b>             | 59 (62.8%)                          | 23 (27.1%)                            | <b>&lt;0.001</b>     |
| <b>Risk Factor: Past Year</b>                                  |                                     |                                       |                      |
| Admitted to a Hospital                                         | 5 (4.9%)                            | 4 (4.1%)                              | 0.78                 |
| Worked at a Hospital                                           | 4 (3.9%)                            | 2 (2%)                                | 0.68                 |
| Known or suspected SSTI/MSSA Infection                         | 7 (6.8%)                            | 6 (6.1%)                              | 0.83                 |
| Taken an Antibiotic in past 6 months                           | 18 (17.5%)                          | 10 (10.2%)                            | 0.13                 |
| <b>Risk Factor: 3 mos. prior to Fort Benning</b>               |                                     |                                       |                      |
| Contact with a Person with Skin Infection                      | 4 (3.9%)                            | 2 (2%)                                | 0.68                 |
| <b>Risk Factor: While at Fort Benning</b>                      |                                     |                                       |                      |
| History of Skin or Soft Tissue Wound                           | 1 (1%)                              | 3 (3.1%)                              | 0.36                 |
| Contact with a Person with Skin Infection                      | 30 (29.1%)                          | 25 (25.5%)                            | 0.54                 |
| Abrasions/Cuts                                                 | 57 (55.3%)                          | 51 (52%)                              | 0.64                 |
| Blister                                                        | 44 (42.7%)                          | 59 (60.2%)                            | <b>0.01</b>          |
| Insect Bite                                                    | 29 (28.2%)                          | 29 (29.6%)                            | 0.82                 |
| <b>Risk Factor: Trainee Survey</b>                             |                                     |                                       |                      |
| Wash Hands or Use Sanitizer                                    | 103 (100%)                          | 97 (99%)                              | 0.82                 |
| Daily Shower                                                   | 103 (100%)                          | 98 (100%)                             | 0.82                 |
| Share Towels and Clothing                                      | 2 (1.9%)                            | 6 (6.1%)                              | 0.16                 |
| Share or Borrow Razors                                         | 1 (1%)                              | 1 (1%)                                | 1                    |
| Wash Towels                                                    | 102 (99%)                           | 94 (95.9%)                            | 0.14                 |
| Wash PT Uniform                                                | 103 (100%)                          | 96 (98%)                              | 0.15                 |
| Wash ACU <sup>f</sup>                                          | 103 (100%)                          | 96 (98%)                              | 0.15                 |
| Shave Body Parts Other than Face                               | 17 (16.5%)                          | 18 (18.4%)                            | 0.75                 |
| Bunkmate/Battle Buddy had Skin/MRSA Infection                  | 13 (12.6%)                          | 7 (7.1%)                              | 0.19                 |

(Continued)

Table 1. (Continued)

|                                                            | SSTI Cases (n = 201)                |                                       | P-Value <sup>b</sup> |
|------------------------------------------------------------|-------------------------------------|---------------------------------------|----------------------|
|                                                            | Abscess Only <sup>a</sup> (n = 103) | Cellulitis Only <sup>a</sup> (n = 98) |                      |
| Sexual Contact in Past 6 mos., Someone with Skin Infection | 2 (1.9%)                            | 0 (0%)                                | 0.5                  |

<sup>a</sup> Unless specified, the numbers in parenthesis correspond to the percentage of total individuals with either abscess or cellulitis.

<sup>b</sup> P-values calculated with chi square test. For counts less than 5, Fisher's exact test was used. P-values for median data were generated using the Wilcoxon rank-sum test. Significant p-values (< 0.05) are shown in bold.

<sup>c</sup> Data unavailable for one abscess participant

<sup>d</sup> Four abscess patients and one cellulitis patient reported more than one SSTI. Lower extremity includes foot, ankle, shin, calf, and thigh. Upper extremity includes forearm, elbow, and shoulder.

<sup>e</sup> Body sites tested: anterior nares, oropharynx, inguinal, perianal.

<sup>f</sup> ACU; army combat uniform

doi:10.1371/journal.pone.0165491.t001

ASO levels eventually increased to above normal levels at 21–28 days. Anti-DNase B titers were unremarkable for all cellulitis patients at both acute and convalescent time points. Of note, linear regression analysis revealed no correlation between ASO titer levels and *Streptococcus* 16S read (discussed below) abundance (data not shown).

### Sequencing results

In total, we sequenced 40 SSTI samples (18 purulent abscess and 22 cellulitis) in a single 454 pyrosequencing run that yielded 1,515,532 raw sequences. 562,027 (37.1%) reads remained

Table 2. Purulent abscess patient information.

| Patient ID | Age / Race | Site of Infection | Abscess Culture    | Body Site Colonization |            |          |          |
|------------|------------|-------------------|--------------------|------------------------|------------|----------|----------|
|            |            |                   |                    | Nose                   | Oropharynx | Perianal | Inguinal |
| 1782       | 22/White   | Hand              | ND                 | CNS                    | CNS        | CNS      | MSSA     |
| 1868       | 17/White   | Elbow             | MSSA               | MSSA                   | CNS        | MSSA     | CNS      |
| 1871       | 21/White   | Elbow             | Other <sup>a</sup> | MRSA                   | NG         | CNS      | CNS      |
| 1876       | 18/White   | Buttock           | MRSA               | CNS                    | CNS        | MRSA     | ND       |
| 1914       | 18/White   | Foot              | ND                 | CNS                    | CNS        | NC       | CNS      |
| 1955       | 17/White   | Lower Leg         | MRSA               | CNS                    | NC         | NC       | NC       |
| 1957       | 17/Asian   | Forearm           | MRSA               | MSSA                   | MSSA       | NC       | NC       |
| 1983       | 18/White   | Chest             | ND                 | CNS                    | CNS        | NC       | NC       |
| 2018       | 18/White   | Foot              | MRSA               | MSSA                   | MSSA       | CNS      | CNS      |
| 2058       | 26/White   | Axilla            | ND                 | MSSA                   | CNS        | NC       | CNS      |
| 2067       | 22/White   | Lower Leg         | ND                 | MSSA                   | MSSA       | CNS      | CNS      |
| 2086       | 19/Asian   | Forearm           | ND                 | CNS                    | CNS        | NC       | NC       |
| 2094       | 24/White   | Knee              | ND                 | CNS                    | MSSA       | NC       | MSSA     |
| 2120       | 19/White   | Axilla            | ND                 | MSSA                   | MSSA       | NC       | CNS      |
| 2152       | 19/Other   | Axilla            | ND                 | MSSA                   | ND         | NC       | NC       |
| 2157       | 19/White   | Hand              | Other <sup>a</sup> | NC                     | MSSA       | NC       | NC       |
| 2160       | 18/White   | Foot              | Other <sup>a</sup> | MSSA                   | CNS        | NC       | NC       |
| 2202       | 18/White   | Axilla            | MRSA               | CNS                    | CNS        | NC       | CNS      |

Abbreviations and symbols: ND, not determined; NG, no growth; CNS, Coagulase-negative *Staphylococcus*; NC, not consented; MSSA, methicillin-sensitive *S. aureus*; MRSA, methicillin-resistant *S. aureus*

<sup>a</sup> Indicates non-*S. aureus* bacterial growth.

doi:10.1371/journal.pone.0165491.t002

Table 3. Cellulitis patient information.

| Patient ID | Age / Race | Site of Infection | ASO Titers <sup>a</sup> (Acute/ Conv) | Anti-DNase B Titers <sup>a</sup> (Acute/ Conv) | Aspirate Culture | Area Erythema (initial/days 2-3/ days 21–28) <sup>b</sup> | Body Site Colonization |            |          |          | Subsequent abscess formation |
|------------|------------|-------------------|---------------------------------------|------------------------------------------------|------------------|-----------------------------------------------------------|------------------------|------------|----------|----------|------------------------------|
|            |            |                   |                                       |                                                |                  |                                                           | Nose                   | Oropharynx | Perianal | Inguinal |                              |
| 1680       | 19/ White  | Foot              | ND                                    | ND                                             | NG               | 203/144/0                                                 | MSSA                   | MSSA       | NC       | CNS      | N                            |
| 1739       | 17/ White  | Lower Leg         | 9/7                                   | <95 /<95                                       | NG               | 216/212.5/0                                               | CNS                    | CNS        | CNS      | MSSA     | N                            |
| 1773       | 21/ White  | Forearm           | <b>499/483</b>                        | <95/<95                                        | NG               | 228/205/0                                                 | CNS                    | NG         | MSSA     | CNS      | N                            |
| 2055       | 18/ White  | Foot              | <b>437/423</b>                        | <95/102                                        | NG               | 405/240/0                                                 | CNS                    | CNS        | NC       | NC       | N                            |
| 2080       | 23/ White  | Foot              | 92/324                                | <95/<95                                        | NG               | -                                                         | MSSA                   | CNS        | MSSA     | MSSA     | N                            |
| 2083       | 18/ White  | Foot              | <b>448/ND</b>                         | <95/ND                                         | CNS              | 48/25/-                                                   | MSSA                   | CNS        | MSSA     | CNS      | ND                           |
| 2124       | 20/ White  | Foot              | <b>220/206</b>                        | <95/<95                                        | NG               | 115/110/0                                                 | MSSA                   | MSSA       | MSSA     | MSSA     | N                            |
| 2128       | 22/ White  | Elbow             | 52/47                                 | <95/109                                        | NG               | 228/144/0                                                 | MSSA                   | CNS        | CNS      | CNS      | N                            |
| 2129       | 22/ White  | Forearm           | 100/100                               | 109/<95                                        | NG               | 225/0/0                                                   | CNS                    | CNS        | CNS      | CNS      | N                            |
| 2171       | 24/ White  | Thigh             | <b>439/129</b>                        | 207/124                                        | NG               | 238/84/0                                                  | MSSA                   | CNS        | MSSA     | MSSA     | Y                            |
| 2172       | 19/ White  | Foot              | 119/113                               | <95/<95                                        | NG               | 115.5/116/0                                               | MSSA                   | MSSA       | CNS      | CNS      | N                            |
| 2203       | 21/ White  | Foot              | 41/37                                 | 97/111                                         | NG               | -                                                         | MSSA                   | NG         | NC       | MSSA     | N                            |
| 2213       | 18/ White  | Knee              | 85/87                                 | <95/<95                                        | NG               | 289/-/0                                                   | MSSA                   | MSSA       | MSSA     | CNS      | N                            |
| 2250       | 24/ White  | Foot              | 58/62                                 | <95/<95                                        | NG               | 72.25/36/0                                                | MSSA                   | CNS        | NC       | MSSA     | N                            |
| 2306       | 22/ White  | Foot              | 25/25                                 | <95/<95                                        | NG               | 38.25/0/0                                                 | CNS                    | CNS        | NC       | CNS      | N                            |
| 2326       | 23/ White  | Foot              | <b>226/229</b>                        | 100/289                                        | NG               | 135/24/0                                                  | MSSA                   | MSSA       | CNS      | CNS      | N                            |
| 2367       | 20/ White  | Knee              | <b>247/259</b>                        | <95/<95                                        | NG               | 532/49/0                                                  | MSSA                   | MSSA       | MSSA     | MSSA     | N                            |
| 2423       | 21/ White  | Foot              | 92/86                                 | 103/<95                                        | NG               | 36/30/0                                                   | NC                     | NC         | NC       | NC       | N                            |
| 2637       | 24/ White  | Elbow             | 10/12                                 | <95/<95                                        | NG               | 144/0/0                                                   | MSSA                   | MSSA       | CNS      | MSSA     | N                            |
| 2758       | 24/ White  | Arm, Elbow        | 13/<6                                 | <95/<95                                        | NG               | -                                                         | MRSA                   | MRSA       | MRSA     | MRSA     | N                            |
| 2867       | 18/ White  | Thigh             | 147/138                               | <95/<95                                        | NG               | 100/36/0                                                  | MSSA                   | MSSA       | NC       | NC       | N                            |
| 2913       | 18/ White  | Thigh             | 19/16                                 | <95/<95                                        | NG               | 90/0/0                                                    | CNS                    | CNS        | CNS      | CNS      | N                            |

Abbreviations and symbols: ND, not determined; NG, no growth; N, no; Y, yes; CNS, Coagulase-negative *Staphylococcus*; NC, not consented; MSSA, methicillin-sensitive *S. aureus*; MRSA, methicillin-resistant *S. aureus*

<sup>a</sup> ASO and DNase B titers are represented as IU/ml and U/ml, respectively. Normal ranges: ASO <200 IU/ml, DNase B <301 U/ml. Titers were measured upon initial admission to the TMC (acute) and at 21–28 days post admission (conv). Elevated titer levels are depicted in bold.

<sup>b</sup> Area measured in centimeters. A dash indicates no measurement taken.

doi:10.1371/journal.pone.0165491.t003



after quality filtering and contaminant/chimera detection. Overall, our sample set contained 1,007 unique reads with an average read length of 257 (range, 230 to 283) nucleotides. On average, there were 30,744 reads associated with each purulent abscess sample (range, 6,663 to 55,430). However, we observed a reduction in associated reads for the cellulitis samples; 4 of the 22 cellulitis samples had 0 associated reads. For the remaining 18, there were on average 480 associated reads per sample (range, 149 to 956). This observation suggests that the bacterial load within the cellulitis samples is substantially reduced compared to the purulent samples. Good's coverage values suggests that the number of reads associated with each sample accurately depict the total level of biodiversity (abscess samples: >99.4%; cellulitis samples: >95.9%). The percent abundance of each observed taxon for both infection types is included in [S1 File](#).

### Purulent abscess microbiome

Analysis of the 18 purulent abscess samples revealed that the most abundant bacterial phylum present was Firmicutes (98.2% average abundance) ([Fig 1A](#)). At the species level, the most abundant bacterium present was *Staphylococcus aureus* (92.9% average abundance) ([Fig 1C](#)). Similar to a previous study [18], we observed a significant number of mixed infections; approximately 22% of the samples (4 of 18) had no single bacterial species reach an abundance level greater than 90%. While all purulent samples were sequence positive for *S. aureus*, additional abscess cohabitants included *Staphylococcus epidermidis*, *Streptococcus agalactiae*, *Staphylococcus haemolyticus*, and *Staphylococcus lugdunensis*.

### Cellulitis microbiome

Of the leading edge aspirate samples, 18 yielded usable sequences. In contrast to the purulent abscess samples, the most abundant bacterial phylum observed was Proteobacteria (89.8%

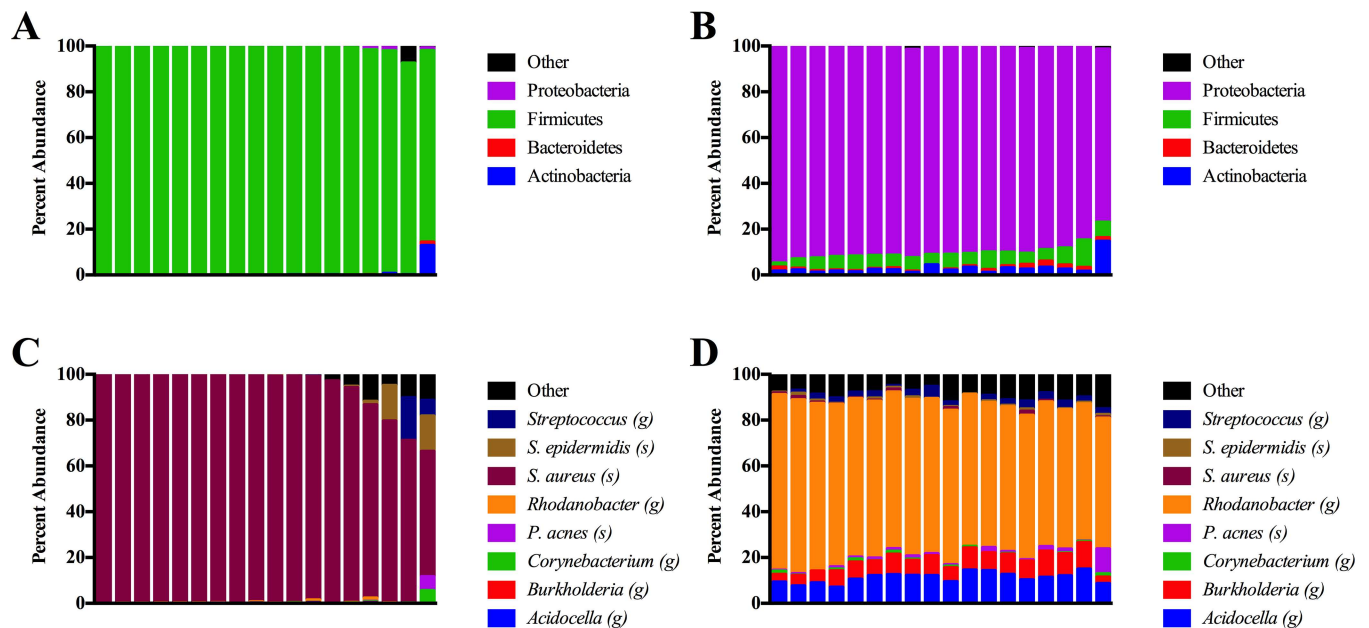

**Fig 1. Microbial composition within purulent abscesses (A and C) and cellulitis (B and D) samples.** The microbiomes were characterized at the bacterial phylum level (A and B) as well as genus (g) and species (s) levels (C and D). Each column corresponds to a single SSTI microbiome.

doi:10.1371/journal.pone.0165491.g001

average abundance) with Firmicutes representing the next most abundant phylum (5.9% average abundance) (Fig 1B). Further taxonomic investigation revealed that the most abundant bacterial species present was the gammaproteobacterium *Rhodanobacter terrae* (66.8% average abundance). While *Rhodanobacter* dominated the cellulitis samples, other clinically relevant genera present included *Streptococcus*, *Staphylococcus*, *Propionibacterium*, and *Burkholderia* (Fig 1D).

To confirm and extend the taxonomy observation obtained by looking at the V1-V3 portion of the 16S rRNA, we additionally amplified, cloned and sequenced at least 10 full-length 16S genes from four randomly chosen cellulitis samples: 2055, 2080, 2203, and 2250. In support of the 454 sequencing data, a large proportion of the full-length 16S sequences were classified as *Rhodanobacter* (Table 4). In addition, many of the sequences were assigned to the closely related *Dyella* genus. Besides *Rhodanobacter* and *Dyella*, we also detected *Acinetobacter* and *Streptococcus*.

## Discussion

We used multiple current technologies and epidemiological data to investigate the etiology and concomitant risks factors for SSTI in a military population. With high-throughput sequencing and culture data, we confirmed that *S. aureus* is associated with cutaneous abscesses [18]. For nonpurulent cellulitis, however, we made a novel observation. Although small quantities of both streptococci and *S. aureus* sequences were recovered from most leading edge aspirate specimens, the most abundant species was the soil bacterium *Rhodanobacter terrae*. To our knowledge, this is the first clinical investigation that utilizes an epidemiological approach as well as standard microbiology, serology, and high-throughput sequencing to characterize cutaneous abscesses and nonpurulent cellulitis.

In the 18 microbiome participants with abscesses, we observed that *S. aureus* dominated most abscesses; however, there were 4 mixed infections. These findings build upon other work by our group. We recently characterized 40 abscess microbiomes in military trainees [18]. We found that while most abscess samples were dominated by *S. aureus*, polymicrobial abscess samples were prevalent. Given that polymicrobial SSTI are typically associated with severe disease such as necrotizing fasciitis [26, 27], it is surprising to find them in uncomplicated SSTI. Future studies should explore the pathogenesis of polymicrobial abscess as compared to mono-microbial infections.

Unlike abscesses, the most abundant bacteria detected in the nonpurulent cellulitis microbiomes were Proteobacteria, particularly from the *Rhodanobacter/Dyella* genera. While there are no reports that suggest that *Rhodanobacter* or *Dyella* infect humans or carry virulence factors, we can hypothesize that cellulitis pathology may be an immune response to the presence of these atypical bacteria. The role of the immune response in the pathology of cellulitis is further supported by previous reports that suggest an inflammatory component to cellulitis infections [28] and the observation that cellulitis more quickly resolves with the addition of NSAIDs and steroids [28, 29]. Furthermore, bacterial culture of cellulitis has been historically unsuccessful; a pathogen is isolated well less than 30% of the time [12–17]. Similarly, in our study only 1 of 22 leading edge aspirates yielded a bacterium (CNS). Thus, perhaps nonpurulent cellulitis is not caused by a traditional infection.

Similar to our study, a recent investigation also subjected needle aspirates to high-throughput sequencing [30]. These authors also identified atypical bacteria. However, they concluded that pyrosequencing/PCR may not be a suitable way to identify the etiology of cellulitis. We would propose a different interpretation of that study; perhaps the presence of these atypical bacteria causes cellulitis not due to active infection, but simply by invoking an active immune

**Table 4. Full-length 16S rRNA taxonomy from cellulitis samples.**

|                            | 2055                                                          | 2080                                              | 2203                                                 | 2250                                              |
|----------------------------|---------------------------------------------------------------|---------------------------------------------------|------------------------------------------------------|---------------------------------------------------|
| <b>Clone 1</b>             | <i>Rhodanobacter terrae</i> ; SPg; FJ405366 100%              | uncultured bacterium; nbu286c01c1; KF063132 100%  | uncultured bacterium; nbu286c01c1; KF063132 98.8%    | uncultured bacterium; nbu286c01c1; KF063132 100%  |
|                            | <i>Rhodanobacter glycinis</i> ; MO64; EU912469 99.8%          | <i>Dyella sp.</i> K4; FR874237 99.1%              | <i>Dyella sp.</i> K4; FR874237 94.2%                 | <i>Dyella sp.</i> K4; FR874237 99.1%              |
|                            | <i>Rhodanobacter glycinis</i> ; MO64; EU912469 99.8%          | <i>Rhodanobacter sp.</i> A2-60; KF441591 98.4%    | <i>Rhodanobacter sp.</i> A2-60; KF441591 90.3%       | <i>Rhodanobacter sp.</i> A2-60; KF441591 98.4%    |
| <b>Clone 2</b>             | <i>Rhodanobacter terrae</i> ; SPg; FJ405366 100%              | uncultured bacterium; nbu286c01c1; KF063132 99.0% | uncultured bacterium; nbu286c01c1; KF063132 99.0%    | uncultured bacterium; nbu286c01c1; KF063132 99.8% |
|                            | <i>Rhodanobacter glycinis</i> ; MO64; EU912469 99.8%          | <i>Dyella sp.</i> K4; FR874237 99.0%              | <i>Dyella sp.</i> K4; FR874237 0.939                 | <i>Dyella sp.</i> K4; FR874237 0.989              |
|                            | <i>Rhodanobacter terrae</i> str. SPg 96.42%                   | <i>Rhodanobacter sp.</i> A2-60; KF441591 98.3%    | <i>Rhodanobacter sp.</i> A2-60; KF441591 90.1%       | <i>Rhodanobacter sp.</i> A2-60; KF441591 98.3%    |
| <b>Clone 3</b>             | uncultured bacterium; nbu286c01c1; KF063132 99.2%             | uncultured bacterium; nbu286c01c1; KF063132 99.4% | uncultured bacterium; nbu286c01c1; KF063132 99.4%    | uncultured bacterium; nbu286c01c1; KF063132 99.3% |
|                            | <i>Dyella sp.</i> K4; FR874237 94.2%                          | <i>Dyella sp.</i> K4; FR874237 94.2%              | <i>Dyella sp.</i> K4; FR874237 94.3%                 | <i>Dyella sp.</i> K4; FR874237 94.4%              |
|                            | <i>Rhodanobacter sp.</i> A2-60; KF441591 90.8%                | <i>Rhodanobacter sp.</i> A2-60; KF441591 90.9%    | <i>Rhodanobacter sp.</i> A2-60; KF441591 89.1%       | <i>Rhodanobacter sp.</i> A2-60; KF441591 90.1%    |
| <b>Clone 4</b>             | uncultured bacterium; nbu286c01c1; KF063132 99.9%             | uncultured bacterium; nbu286c01c1; KF063132 99.9% | uncultured bacterium; nbu286c01c1; KF063132 98.5%    | uncultured bacterium; nbu286c01c1; KF063132 99.3% |
|                            | <i>Dyella sp.</i> K4; FR874237 0.943                          | <i>Dyella sp.</i> K4; FR874237 94.8%              | <i>Dyella sp.</i> K4; FR874237 93.7%                 | <i>Dyella sp.</i> K4; FR874237 94.2%              |
|                            | <i>Rhodanobacter sp.</i> A2-60; KF441591 90.6%                | <i>Rhodanobacter sp.</i> A2-60; KF441591 91.1%    | <i>Rhodanobacter sp.</i> A2-60; KF441591 90.0%       | <i>Rhodanobacter sp.</i> A2-60; KF441591 90.1%    |
| <b>Clone 5</b>             | uncultured bacterium; nbu286c01c1; KF063132 99.9%             | uncultured bacterium; nbu286c01c1; KF063132 99.1% | uncultured bacterium; nbu286c01c1; KF063132 99.4%    | uncultured bacterium; nbu286c01c1; KF063132 99.1% |
|                            | <i>Dyella sp.</i> K4; FR874237 0.948                          | <i>Dyella sp.</i> K4; FR874237 94.2%              | <i>Dyella sp.</i> K4; FR874237 94.2%                 | <i>Dyella sp.</i> K4; FR874237 94.0%              |
|                            | <i>Rhodanobacter sp.</i> A2-60; KF441591 91.1%                | <i>Rhodanobacter sp.</i> A2-60; KF441591 90.2%    | <i>Rhodanobacter sp.</i> A2-60; KF441591 90.6%       | <i>Rhodanobacter sp.</i> A2-60; KF441591 90.5%    |
| <b>Clone 6<sup>a</sup></b> | uncultured bacterium; nbu286c01c1; KF063132 99.2%             | uncultured bacterium; nbu286c01c1; KF063132 99.0% | bacterium BM0247; JQ680693 100%                      | uncultured bacterium; nbu286c01c1; KF063132 99.5% |
|                            | <i>Dyella sp.</i> K4; FR874237 94.1%                          | <i>Dyella sp.</i> K4; FR874237 0.933              | <i>Escherichia coli</i> ; r47; JQ661027 99.8%        | <i>Dyella sp.</i> K4; FR874237 94.3%              |
|                            | <i>Rhodanobacter sp.</i> A2-60; KF441591 90.1%                | <i>Rhodanobacter sp.</i> A2-60; KF441591 89.5%    | <i>Escherichia coli</i> ; H16; JN129456 99.8%        | <i>Rhodanobacter sp.</i> A2-60; KF441591 90.6%    |
| <b>Clone 7</b>             | <i>Rhodanobacter glycinis</i> ; MO64; EU912469 100%           | uncultured bacterium; nbu286c01c1; KF063132 99.5% | <i>Rhodanobacter terrae</i> ; SPg; FJ405366 100%     | uncultured bacterium; nbu286c01c1; KF063132 99.3% |
|                            | <i>Rhodanobacter sp.</i> B64; EU194895 100%                   | <i>Dyella sp.</i> K4; FR874237 94.4%              | <i>Rhodanobacter glycinis</i> ; MO64; EU912469 99.8% | <i>Dyella sp.</i> K4; FR874237 94.2%              |
|                            | <i>Rhodanobacter terrae</i> ; SPg; FJ405366 99.8%             | <i>Rhodanobacter sp.</i> A2-60; KF441591 90.7%    | <i>Rhodanobacter sp.</i> B64; EU194895 99.5%         | <i>Rhodanobacter sp.</i> A2-60; KF441591 90.3%    |
| <b>Clone 8<sup>a</sup></b> | <i>Escherichia coli</i> ; r47; JQ661027 99.1%                 | uncultured bacterium; nbu286c01c1; KF063132 99.4% | uncultured bacterium; nbu286c01c1; KF063132 98.3%    | Uncultured bacterium JF204832 100%                |
|                            | uncultured organism; ELU0124-T310-S-NI_000496; HQ791715 99.1% | <i>Dyella sp.</i> K4; FR874237 94.2%              | <i>Dyella sp.</i> K4; FR874237 93.3%                 | uncultured bacterium; ncd2350h08c1; JF205603 100% |

(Continued)

Table 4. (Continued)

|                 | 2055                                                    | 2080                                                    | 2203                                                    | 2250                                                    |
|-----------------|---------------------------------------------------------|---------------------------------------------------------|---------------------------------------------------------|---------------------------------------------------------|
|                 | <i>Escherichia coli</i> ; NBRC 12062; AB680228<br>99.1% | <i>Rhodanobacter sp.</i> A2-60;<br>KF441591 90.6%       | <i>Rhodanobacter sp.</i> A2-60;<br>KF441591 89.9%       | <i>Streptococcus oralis</i> ATCC<br>700233 99.6%        |
| <b>Clone 9</b>  | uncultured bacterium GQ096144 99.6%                     | uncultured bacterium;<br>nbu286c01c1; KF063132<br>99.1% | uncultured bacterium;<br>nbu286c01c1; KF063132<br>99.6% | uncultured bacterium;<br>nbu286c01c1; KF063132<br>99.4% |
|                 | <i>Acinetobacter parvus</i> KJ806336 99.6%              | <i>Dyella sp.</i> K4; FR874237<br>93.9%                 | <i>Dyella sp.</i> K4; FR874237<br>94.5%                 | <i>Dyella sp.</i> K4; FR874237<br>94.2%                 |
|                 | uncultured bacterium; nbw109h05c1;<br>GQ007804 99.3%    | <i>Rhodanobacter sp.</i> A2-60;<br>KF441591 90.4%       | <i>Rhodanobacter sp.</i> A2-60;<br>KF441591 90.9%       | <i>Rhodanobacter sp.</i> A2-60;<br>KF441591 90.6%       |
| <b>Clone 10</b> | <i>Rhodanobacter glycinis</i> ; MO64; EU912469<br>98.7% | uncultured bacterium;<br>nbu286c01c1; KF063132<br>99.9% | uncultured bacterium;<br>nbu286c01c1; KF063132<br>99.1% | uncultured bacterium;<br>nbu286c01c1; KF063132<br>98.0% |
|                 | <i>Rhodanobacter sp.</i> B64; EU194895 98.7%            | <i>Dyella sp.</i> K4; FR874237<br>94.8%                 | <i>Dyella sp.</i> K4; FR874237<br>93.9%                 | <i>Dyella sp.</i> K4; FR874237<br>93.2%                 |
|                 | <i>Rhodanobacter terrae</i> ; SPg; FJ405366 98.0%       | <i>Rhodanobacter sp.</i> A2-60;<br>KF441591 91.1%       | <i>Rhodanobacter sp.</i> A2-60;<br>KF441591 88.8%       | <i>Rhodanobacter sp.</i> A2-60;<br>KF441591 90.0%       |
| <b>Clone 11</b> | uncultured bacterium; nbu286c01c1;<br>KF063132 99.9%    |                                                         | uncultured bacterium;<br>nbu286c01c1; KF063132<br>99.5% |                                                         |
|                 | <i>Dyella sp.</i> K4; FR874237 94.8%                    |                                                         | <i>Dyella sp.</i> K4; FR874237<br>94.6%                 |                                                         |
|                 | <i>Rhodanobacter sp.</i> A2-60; KF441591 91.1%          |                                                         | <i>Rhodanobacter sp.</i> A2-60;<br>KF441591 90.9%       |                                                         |

Taxonomy information according to the RDP database. GenBank accession listed after species name. Top three hits per clone are given. Percentages represent percent identity.

<sup>a</sup> *Escherichia coli* reads likely indicate purification of contaminate DNA from the *E. coli* TOP 10 cells that carried the cloned 16S sequences.

doi:10.1371/journal.pone.0165491.t004

response. This possibility has yet to be confirmed but should be investigated further in the future. While the atypical bacteria observed in the Crisp *et al.* study (eg. *Acidovorax*, *Enterococcus*, and *Lactococcus*) were not seen in our study, this discrepancy may be explained by differences in study populations (U.S. emergency department patients versus military trainees), site of needle aspiration (center versus leading edge), sample transportation (anaerobic media versus -80°C), or sequencing data analysis pipelines (custom C# program versus mothur). Despite these differences, both studies strongly suggest a potential role of atypical bacteria in the etiology of cellulitis and together support the hypothesis that many cases of nonpurulent cellulitis may represent a nonspecific immune response to the presence of atypical bacteria.

Numerous reports have investigated the potential use of serology to aid in determining cellulitis etiology. Most of these serological tests (e.g. ASO) have aimed at detecting antibodies to BHS, given their role as a possible cause of cellulitis [11, 15, 16, 31, 32]. Indeed, 8 of the cellulitis patients in our study had elevated ASO titers at the acute and/or convalescent time points: a 36.4% seroconversion rate indicative of BHS exposure. In an investigation assessing serologic conversion, 73% of nonpurulent cellulitis was suggested to be caused by BHS and 27% was not identifiable [31]. Another study yielded a similar seroconversion rate (74%) for cellulitis/erysipelas [33]. Together those reports suggest the bulk of nonpurulent cellulitis may be caused by BHS. In contrast, while a substantial proportion of nonpurulent cellulitis participants were seropositive for BHS, our pyrosequencing data revealed that *Streptococcus* represented only a minor fraction of the total aspirate microbiota (approximately 2–5% average abundance) and was greatly outnumbered by the atypical bacteria discussed above (Fig 1D). Thus, these results challenge the current dogma that cellulitis is caused solely by *S. aureus* and beta-hemolytic streptococci.

We noted similarly high colonization rates between abscess and nonpurulent cellulitis participants, where nearly 90% were colonized with *S. aureus*. Additionally, as has been described by others, colonization prevalence was nearly doubled by assessing extra-nasal sites [34]. This colonization prevalence is similar to what Albrecht *et al.* found among 147 patients with abscesses, where 81% overall were colonized with *S. aureus* [35]. We also observed that 63% of abscess participants were colonized with MRSA and that both nasal and extra-nasal MRSA colonization was associated with abscesses. This MRSA colonization prevalence is similar to the 61% described by Fritz *et al.* in a pediatric population [36]. Taken together, these data lend further support to the role of colonization in the pathogenesis of purulent SSTI.

We observed that compared to abscesses, nonpurulent cellulitis more frequently affected the lower extremities, and was associated with blisters. The lower extremity has been described as the most common site for cellulitis in both military and non-military populations [37, 38]. Skin disruption is a risk factor that has been described for the development of lower extremity cellulitis, and blisters are especially common early in military training [38, 39]. It may be that skin disruption permits increased localized bacterial burden, as has been described with tinea pedis [40].

There are clear limitations to our study. First, leading edge aspiration was performed only on cellulitis participants and not on unaffected skin. Unfortunately, we were unable to receive IRB approval to obtain aspirates from active duty military personnel who were not suffering from cellulitis. It should be noted that a few studies have begun to characterize the healthy subcutaneous tissue microbiome, and have detected bacteria such as *Propionibacterium acnes*, *Staphylococcus epidermidis*, and *Pseudomonas spp.* in both the reticular and dermal adipose layers [41]. Interestingly, all three of these organisms were also detected in our cellulitis aspirates at very low levels (S1 File). One may only speculate on the role of these subcutaneous bacteria in health or in disease. Secondly, we assessed colonization and potential risk factors only at presentation and not at the beginning of training; therefore, we cannot determine whether colonization or other risk factors preceded infection. Third, with regard to ASO titers, it is difficult to determine if these titers are associated with cellulitis or recent BHS infection prior to arrival. Alternatively, given the low abundance of bacteria observed in these uncomplicated and non-hospitalized cellulitis cases, it is also possible that ASO titers may not yet be detectable (false-negative). We also acknowledge that while ASO titers did not correlate with the *Streptococcus* 16S reads, those sequences are portrayed as relative abundance; thus, we are unable to assess total bacterial load at any body site. Lastly, our study population is composed entirely of young, healthy males in a setting where infections are actively monitored and prevented. Therefore, our results may not be generalizable to SSTIs in the general population or in immunocompromised patients.

In conclusion, our results emphasize that cutaneous abscess and nonpurulent cellulitis represent two distinct diseases. While purulent abscesses are rich in *S. aureus* and associated with MRSA nasal colonization, we detected atypical bacteria such as *Rhodanobacter/Dyella* in our cellulitis specimens. Thus, while both infections are SSTI and share overlapping clinical characteristics, they differ in etiology and likely in pathogenesis. Future work should seek to capitalize on advances in diagnostic and sequencing technologies as means to investigate these distinct disease states.

## Supporting Information

**S1 File. Percent abundance of each taxon per sample according to the GreenGenes database.** Each column represents one sample and is labeled with sample ID, infection group (abscess or cellulitis), and total number of reads associated with each sample. The results for the PBS negative control are included. (XLSX)

## Acknowledgments

We are indebted to the study team of clinical research coordinators, laboratory personnel, and data management staff for their dedication to the project. We would like to thank the USUHS Biomedical Instrumentation Center for their assistance with the full-length 16S rRNA gene sequencing. The views expressed in this paper are those of the authors and do not necessarily represent the views of the Uniformed Services University of the Health Sciences, the Department of the Navy, the Department of the Army, Department of Defense (DoD), nor the U.S. Government.

Note: Drs. Merrell, Bishop, Teneza-Mora, Ellis, Hall, and Lanier are service members or employees of the U.S. Government. This work was prepared as part of their official duties. Title 17 U.S.C. §105 provides that 'Copyright protection under this title is not available for any work of the United States Government.' Title 17 U.S.C. §101 defines a U.S. Government work as a work prepared by a military service member or employee of the U.S. Government as part of that person's official duties.

## Author Contributions

**Conceptualization:** RCJ MWE CDS EVM JBL NT DKB ERH DSM.

**Formal analysis:** RCJ DM EME TC.

**Funding acquisition:** MWE ERH DSM.

**Investigation:** RCJ PTL DM EME CLR TC.

**Methodology:** RCJ MWE CDS EVM NT DKB ERH DSM.

**Project administration:** MWE CDS EVM JBL DKB ERH DSM.

**Resources:** MWE CDS EVM CLR KAB.

**Supervision:** MWE NT DKB ERH KAB DSM.

**Visualization:** RCJ.

**Writing – original draft:** RCJ MWE PTL DSM.

**Writing – review & editing:** RCJ MWE CDS EVM PTL DM EME JBL CLR TC NT DKB ERH KAB DSM.

## References

1. Edelsberg J, Taneja C, Zervos M, Haque N, Moore C, Reyes K, et al. Trends in US hospital admissions for skin and soft tissue infections. *Emerging infectious diseases*. 2009 Sep; 15(9):1516–8. PMID: [19788830](#). Pubmed Central PMCID: 2819854. doi: [10.3201/eid1509.081228](#)
2. Hersh AL, Chambers HF, Maselli JH, Gonzales R. National trends in ambulatory visits and antibiotic prescribing for skin and soft-tissue infections. *Archives of internal medicine*. 2008 Jul 28; 168(14):1585–91. PMID: [18663172](#). doi: [10.1001/archinte.168.14.1585](#)
3. Pallin DJ, Egan DJ, Pelletier AJ, Espinola JA, Hooper DC, Camargo CA Jr. Increased US emergency department visits for skin and soft tissue infections, and changes in antibiotic choices, during the emergence of community-associated methicillin-resistant *Staphylococcus aureus*. *Annals of emergency medicine*. 2008 Mar; 51(3):291–8. PMID: [18222564](#). doi: [10.1016/j.annemergmed.2007.12.004](#)
4. Stevens DL, Bisno AL, Chambers HF, Dellinger EP, Goldstein EJ, Gorbach SL, et al. Practice guidelines for the diagnosis and management of skin and soft tissue infections: 2014 update by the Infectious Diseases Society of America. *Clinical infectious diseases: an official publication of the Infectious Diseases Society of America*. 2014 Jul 15; 59(2):e10–52. PMID: [24973422](#). doi: [10.1093/cid/ciu444](#)
5. Zinderman CE, Conner B, Malakooti MA, LaMar JE, Armstrong A, Bohnker BK. Community-acquired methicillin-resistant *Staphylococcus aureus* among military recruits. *Emerging infectious diseases*.

- 2004 May; 10(5):941–4. PMID: [15200838](#). Pubmed Central PMCID: 3323224. doi: [10.3201/eid1005.030604](#)
6. Campbell KM, Vaughn AF, Russell KL, Smith B, Jimenez DL, Barrozo CP, et al. Risk factors for community-associated methicillin-resistant *Staphylococcus aureus* infections in an outbreak of disease among military trainees in San Diego, California, in 2002. *Journal of clinical microbiology*. 2004 Sep; 42(9):4050–3. PMID: [15364988](#). Pubmed Central PMCID: 516279. doi: [10.1128/JCM.42.9.4050-4053.2004](#)
  7. Stryjewski ME, Chambers HF. Skin and soft-tissue infections caused by community-acquired methicillin-resistant *Staphylococcus aureus*. *Clinical infectious diseases: an official publication of the Infectious Diseases Society of America*. 2008 Jun 1; 46 Suppl 5:S368–77. PMID: [18462092](#). doi: [10.1086/533593](#)
  8. Moran GJ, Krishnadasan A, Gorwitz RJ, Fosheim GE, McDougal LK, Carey RB, et al. Methicillin-resistant *S. aureus* infections among patients in the emergency department. *The New England journal of medicine*. 2006 Aug 17; 355(7):666–74. PMID: [16914702](#). doi: [10.1056/NEJMoa055356](#)
  9. Rajan S. Skin and soft-tissue infections: classifying and treating a spectrum. *Cleveland Clinic journal of medicine*. 2012 Jan; 79(1):57–66. PMID: [22219235](#). doi: [10.3949/ccjm.79a.11044](#)
  10. Tognetti L, Martinelli C, Berti S, Hercogova J, Lotti T, Leoncini F, et al. Bacterial skin and soft tissue infections: review of the epidemiology, microbiology, aetiopathogenesis and treatment: a collaboration between dermatologists and infectivologists. *Journal of the European Academy of Dermatology and Venereology: JEADV*. 2012 Aug; 26(8):931–41. PMID: [22214317](#). doi: [10.1111/j.1468-3083.2011.04416.x](#)
  11. Gunderson CG. Cellulitis: definition, etiology, and clinical features. *The American journal of medicine*. 2011 Dec; 124(12):1113–22. PMID: [22014791](#). doi: [10.1016/j.amjmed.2011.06.028](#)
  12. Swartz MN. Clinical practice. Cellulitis. *The New England journal of medicine*. 2004 Feb 26; 350(9):904–12. PMID: [14985488](#). doi: [10.1056/NEJMcp031807](#)
  13. Duvanel T, Auckenthaler R, Rohner P, Harms M, Saurat JH. Quantitative cultures of biopsy specimens from cutaneous cellulitis. *Archives of internal medicine*. 1989 Feb; 149(2):293–6. PMID: [2644902](#).
  14. Perl B, Gottehrer NP, Raveh D, Schlesinger Y, Rudensky B, Yinnon AM. Cost-effectiveness of blood cultures for adult patients with cellulitis. *Clinical infectious diseases: an official publication of the Infectious Diseases Society of America*. 1999 Dec; 29(6):1483–8. PMID: [10585800](#). doi: [10.1086/313525](#)
  15. Newell PM, Norden CW. Value of needle aspiration in bacteriologic diagnosis of cellulitis in adults. *Journal of clinical microbiology*. 1988 Mar; 26(3):401–4. PMID: [3356783](#). Pubmed Central PMCID: 266301.
  16. Hook EW 3rd, Hooton TM, Horton CA, Coyle MB, Ramsey PG, Turck M. Microbiologic evaluation of cutaneous cellulitis in adults. *Archives of internal medicine*. 1986 Feb; 146(2):295–7. PMID: [3947189](#).
  17. Patel Wylie F, Kaplan SL, Mason EO, Allen CH. Needle aspiration for the etiologic diagnosis of children with cellulitis in the era of community-acquired methicillin-resistant *Staphylococcus aureus*. *Clinical pediatrics*. 2011 Jun; 50(6):503–7. PMID: [21262759](#). doi: [10.1177/0009922810394652](#)
  18. Johnson RC, Ellis MW, Lanier JB, Schlett CD, Cui T, Merrell DS. Correlation between nasal microbiome composition and remote purulent skin and soft tissue infections. *Infection and immunity*. 2015 Feb; 83(2):802–11. PMID: [25486991](#). Pubmed Central PMCID: 4294227. doi: [10.1128/IAI.02664-14](#)
  19. Ellis MW, Griffith ME, Dooley DP, McLean JC, Jorgensen JH, Patterson JE, et al. Targeted intranasal mupirocin to prevent colonization and infection by community-associated methicillin-resistant *Staphylococcus aureus* strains in soldiers: a cluster randomized controlled trial. *Antimicrobial agents and chemotherapy*. 2007 Oct; 51(10):3591–8. PMID: [17682105](#). Pubmed Central PMCID: 2043273. doi: [10.1128/AAC.01086-06](#)
  20. Ellis MW, Griffith ME, Jorgensen JH, Hospenthal DR, Mende K, Patterson JE. Presence and molecular epidemiology of virulence factors in methicillin-resistant *Staphylococcus aureus* strains colonizing and infecting soldiers. *Journal of clinical microbiology*. 2009 Apr; 47(4):940–5. PMID: [19213694](#). Pubmed Central PMCID: 2668321. doi: [10.1128/JCM.02352-08](#)
  21. Ellis MW, Schlett CD, Millar EV, Wilkins KJ, Crawford KB, Morrison-Rodriguez SM, et al. Hygiene strategies to prevent methicillin-resistant *Staphylococcus aureus* skin and soft tissue infections: a cluster-randomized controlled trial among high-risk military trainees. *Clinical infectious diseases: an official publication of the Infectious Diseases Society of America*. 2014 Jun; 58(11):1540–8. PMID: [24633684](#). Pubmed Central PMCID: 4017895. doi: [10.1093/cid/ciu166](#)
  22. Turner S, Pryer KM, Miao VP, Palmer JD. Investigating deep phylogenetic relationships among cyanobacteria and plastids by small subunit rRNA sequence analysis. *The Journal of eukaryotic microbiology*. 1999 Jul-Aug; 46(4):327–38. PMID: [10461381](#).

23. Wang Y, Qian PY. Conservative fragments in bacterial 16S rRNA genes and primer design for 16S ribosomal DNA amplicons in metagenomic studies. *PloS one*. 2009; 4(10):e7401. PMID: [19816594](#). Pubmed Central PMCID: 2754607. doi: [10.1371/journal.pone.0007401](#)
24. Ellis MW, Johnson RC, Crawford K, Lanier JB, Merrell DS. Molecular characterization of a catalase-negative methicillin-susceptible *Staphylococcus aureus* subsp. *aureus* strain collected from a patient with cutaneous abscess. *Journal of clinical microbiology*. 2014 Jan; 52(1):344–6. PMID: [24131694](#). Pubmed Central PMCID: 3911441. doi: [10.1128/JCM.02455-13](#)
25. Cole JR, Wang Q, Cardenas E, Fish J, Chai B, Farris RJ, et al. The Ribosomal Database Project: improved alignments and new tools for rRNA analysis. *Nucleic acids research*. 2009 Jan; 37(Database issue):D141–5. PMID: [19004872](#). Pubmed Central PMCID: 2686447. doi: [10.1093/nar/gkn879](#)
26. Elliott D, Kufera JA, Myers RA. The microbiology of necrotizing soft tissue infections. *American journal of surgery*. 2000 May; 179(5):361–6. PMID: [10930480](#).
27. McHenry CR, Piotrowski JJ, Petrinic D, Malangoni MA. Determinants of mortality for necrotizing soft-tissue infections. *Annals of surgery*. 1995 May; 221(5):558–63; discussion 63–5. PMID: [7748037](#). Pubmed Central PMCID: 1234638.
28. Dall L, Peterson S, Simmons T, Dall A. Rapid resolution of cellulitis in patients managed with combination antibiotic and anti-inflammatory therapy. *Cutis*. 2005 Mar; 75(3):177–80. PMID: [15839362](#).
29. Bergkvist PI, Sjobeck K. Antibiotic and prednisolone therapy of erysipelas: a randomized, double blind, placebo-controlled study. *Scandinavian journal of infectious diseases*. 1997; 29(4):377–82. PMID: [9360253](#).
30. Crisp JG, Takhar SS, Moran GJ, Krishnadasan A, Dowd SE, Finegold SM, et al. Inability of Polymerase Chain Reaction, Pyrosequencing, and Culture of Infected and Uninfected Site Skin Biopsy Specimens to Identify the Cause of Cellulitis. *Clinical infectious diseases: an official publication of the Infectious Diseases Society of America*. 2015 Aug 3. PMID: [26240200](#). doi: [10.1093/cid/civ655](#)
31. Jeng A, Beheshti M, Li J, Nathan R. The role of beta-hemolytic streptococci in causing diffuse, nonculturable cellulitis: a prospective investigation. *Medicine*. 2010 Jul; 89(4):217–26. PMID: [20616661](#). doi: [10.1097/MD.0b013e3181e8d635](#)
32. Lawlor MT, Crowe HM, Quintiliani R. Cellulitis due to *Streptococcus pneumoniae*: case report and review. *Clinical infectious diseases: an official publication of the Infectious Diseases Society of America*. 1992 Jan; 14(1):247–50. PMID: [1571440](#).
33. Leppard BJ, Seal DV, Colman G, Hallas G. The value of bacteriology and serology in the diagnosis of cellulitis and erysipelas. *The British journal of dermatology*. 1985 May; 112(5):559–67. PMID: [4005155](#).
34. Miller LG, Eells SJ, Taylor AR, David MZ, Ortiz N, Zychowski D, et al. *Staphylococcus aureus* colonization among household contacts of patients with skin infections: risk factors, strain discordance, and complex ecology. *Clinical infectious diseases: an official publication of the Infectious Diseases Society of America*. 2012 Jun; 54(11):1523–35. PMID: [22474221](#). Pubmed Central PMCID: 3348950. doi: [10.1093/cid/cis213](#)
35. Albrecht VS, Limbago BM, Moran GJ, Krishnadasan A, Gorwitz RJ, McDougal LK, et al. *Staphylococcus aureus* Colonization and Strain Type at Various Body Sites among Patients with a Closed Abscess and Uninfected Controls at U.S. Emergency Departments. *Journal of clinical microbiology*. 2015 Nov; 53(11):3478–84. PMID: [26292314](#). doi: [10.1128/JCM.01371-15](#)
36. Fritz SA, Hogan PG, Hayek G, Eisenstein KA, Rodriguez M, Krauss M, et al. *Staphylococcus aureus* colonization in children with community-associated *Staphylococcus aureus* skin infections and their household contacts. *Archives of pediatrics & adolescent medicine*. 2012 Jun 1; 166(6):551–7. PMID: [22665030](#). Pubmed Central PMCID: 3596005. doi: [10.1001/archpediatrics.2011.900](#)
37. Ellis Simonsen SM, van Orman ER, Hatch BE, Jones SS, Gren LH, Hegmann KT, et al. Cellulitis incidence in a defined population. *Epidemiology and infection*. 2006 Apr; 134(2):293–9. PMID: [16490133](#). Pubmed Central PMCID: 2870381. doi: [10.1017/S095026880500484X](#)
38. Martinez-Lopez LE, Friedl KE, Moore RJ, Kramer TR. A longitudinal study of infections and injuries of Ranger students. *Military medicine*. 1993 Jul; 158(7):433–7. PMID: [8351042](#).
39. Dupuy A, Benchikhi H, Roujeau JC, Bernard P, Vaillant L, Chosidow O, et al. Risk factors for erysipelas of the leg (cellulitis): case-control study. *Bmj*. 1999 Jun 12; 318(7198):1591–4. PMID: [10364117](#). Pubmed Central PMCID: 28138.
40. Semel JD, Goldin H. Association of athlete's foot with cellulitis of the lower extremities: diagnostic value of bacterial cultures of ipsilateral interdigital space samples. *Clinical infectious diseases: an official publication of the Infectious Diseases Society of America*. 1996 Nov; 23(5):1162–4. PMID: [8922818](#).
41. Nakatsuji T, Chiang HI, Jiang SB, Nagarajan H, Zengler K, Gallo RL. The microbiome extends to sub-epidermal compartments of normal skin. *Nature communications*. 2013; 4:1431. PMID: [23385576](#). Pubmed Central PMCID: 3655727. doi: [10.1038/ncomms2441](#)
